# Supplementary material for: Modified α–β chimeric oligoDNA bearing a multi-conjugate of 2,2-bis(hydroxymethyl)propionic acid–anthraquinone–polyamine exhibited improved and stereo-nonspecific triplex-forming ability
Source: Royal Society of Chemistry journal article supplement (doi:10.1039/b514325j), 2005-11-23
Supplement: b514325j.pdf [file b514325j.pdf]

**Modified a-b chimeric oligoDNA bearing a multi-conjugate of 2,2-bis(hydroxymethyl)propionic acid-anthraquinone-polyamine exhibited improved and stereo-nonspecific triplex-forming ability**

**A.T.M. Zafrul Azam, Tomohisa Moriguchi and Kazuo Shinozuka\***

*Department of Chemistry, Faculty of Engineering, Gunma University  
1-5-1, Tenjin-cho, Kiryu, Gunma 376-8515, Japan*

**1. UV-melting curves of triplex at pH 6.5 (full-match)**

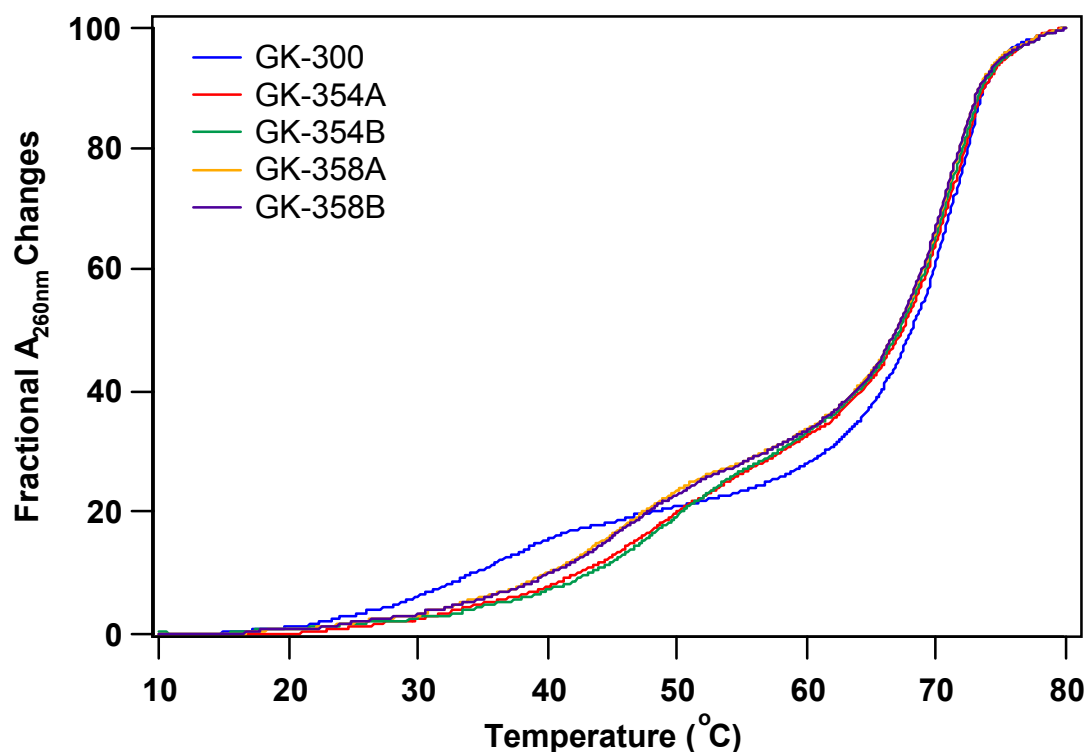

**Fig. S1** UV-melting profile of the triple helices at pH 6.5. The full-match duplex consisting of **ODN-2** and **ODN-3** (1.5  $\mu$ M) was mixed with appropriate TFO (1.5  $\mu$ M) in sodium cacodylate buffer (10 mM, pH 6.5) containing 100 mM NaCl, 1.0 mM spermine, and 10 mM MgCl<sub>2</sub>. The temperature was raised at 0.1 °C/min and thermally induced transition of each mixture was monitored at 260nm.

## 2. UV-melting curves of triplex at pH 7.0 (full-match)

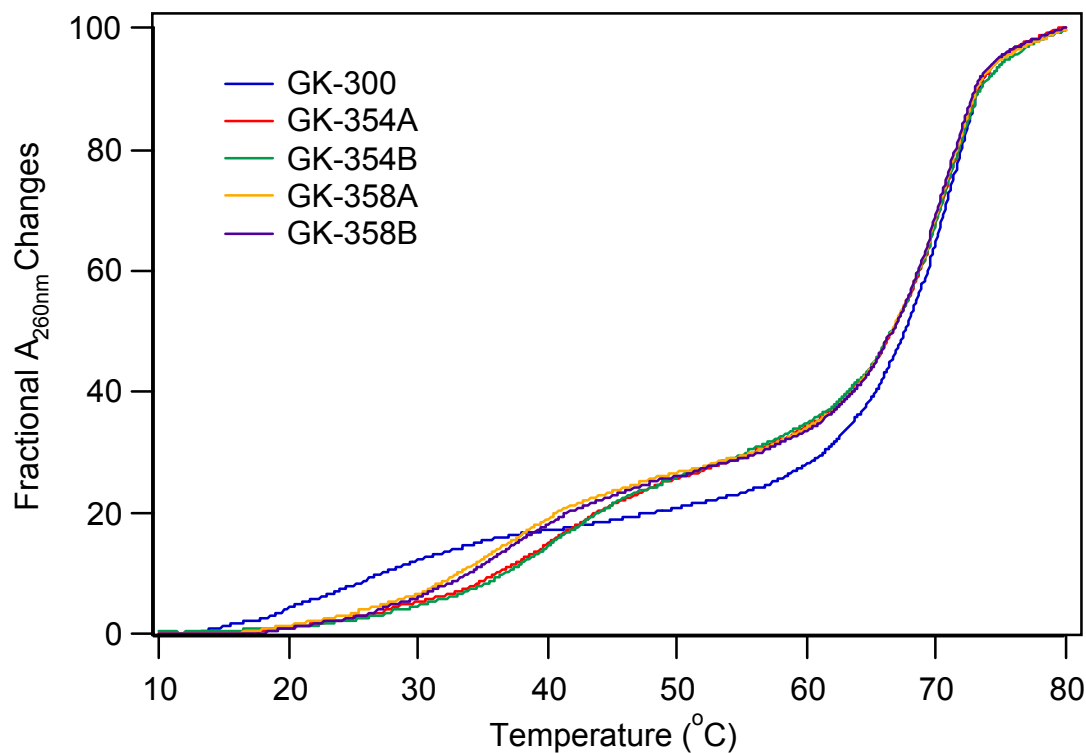

**Fig. S2** UV-melting profile of the triple helices at pH 7.0. The full-match duplex consisting of **ODN-2** and **ODN-3** (1.5  $\mu$ M) was mixed with appropriate TFO (1.5  $\mu$ M) in sodium cacodylate buffer (10 mM, pH 7.0) containing 100 mM NaCl, 1.0 mM spermine, and 10mM MgCl<sub>2</sub>. The temperature was raised at 0.1 °C/min and thermally induced transition of each mixture was monitored at 260nm.

### 3. UV-melting curves of triplex at pH 6.5 (mismatch)

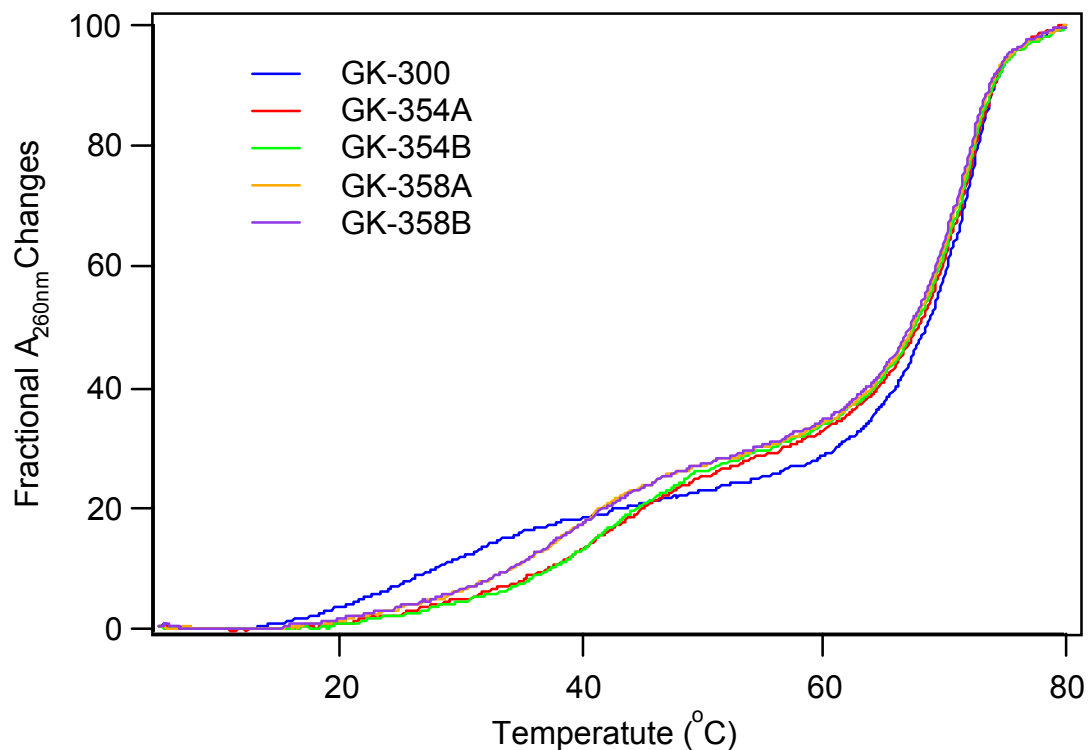

**Fig. S3** UV-melting profiles of the triple helices at pH 6.5. The mismatch duplex consisting of **ODN-4** and **ODN-5** (1.5  $\mu$ M) was mixed with appropriate TFO (1.5  $\mu$ M) in sodium cacodylate buffer (10 mM, pH 6.5) containing 100 mM NaCl, 1.0 mM spermine, and 10 mM MgCl<sub>2</sub>. The temperature was raised at 0.1 °C/min and thermally induced transition of each mixture was monitored at 260nm.

#### 4. UV-melting curves of triplex at pH 7.0 (mismatch)

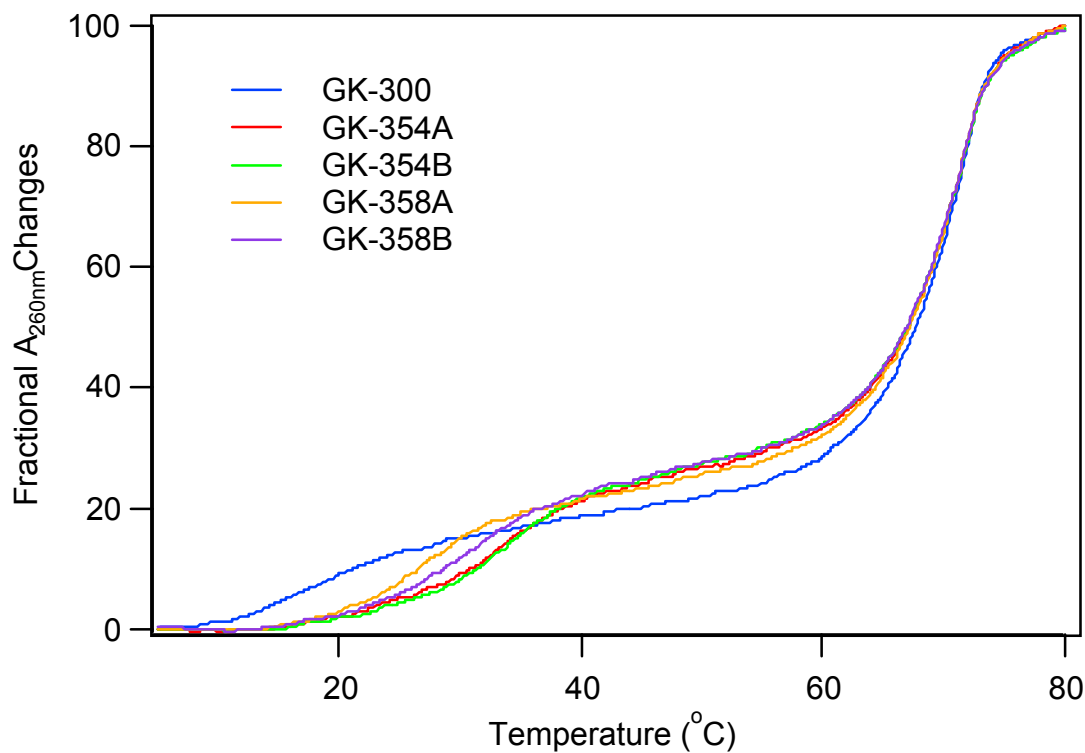

**Fig. S4** UV-melting profiles of the triple helices at pH 7.0. The mismatch duplex consisting of **ODN-4** and **ODN-5** (1.5  $\mu\text{M}$ ) was mixed with appropriate TFO (1.5  $\mu\text{M}$ ) in sodium cacodylate buffer (10 mM, pH 7.0) containing 100 mM NaCl, 1.0 mM spermine, and 10 mM  $\text{MgCl}_2$ . The temperature was raised at 0.1  $^\circ\text{C}/\text{min}$  and thermally induced transition of each mixture was monitored at 260nm.
